# Supplementary material for: Beyond graphene foam, a new form of three-dimensional graphene for supercapacitor electrodes
Source: Royal Society of Chemistry journal article supplement (doi:10.1039/c5ta10031c), 2015-12-22
Supplement: c5ta10031c1.pdf [file c5ta10031c1.pdf]

*Supporting Information for*

***Beyond Graphene Foam, a New Form of Three-Dimensional Graphene for Supercapacitor Electrode***

Lu Zhang <sup>a</sup>, Derek DeArmond <sup>ab</sup>, Noe T. Alvarez <sup>a</sup>, Daoli Zhao <sup>c</sup>, Tingting Wang <sup>c</sup>,  
Guangfeng Hou <sup>a</sup>, Rachit Malik <sup>a</sup>, William R. Heineman <sup>c</sup>, Vesselin Shanov <sup>a,b\*</sup>

<sup>a</sup> Department of Mechanical and Materials Engineering, University of Cincinnati, Cincinnati, OH 45221-0072, USA

<sup>b</sup> Department of Biomedical, Chemical and Environmental Engineering, University of Cincinnati, OH, 45221-0012, USA

<sup>c</sup> Department of Chemistry, University of Cincinnati, Cincinnati, OH, 45221-0172, USA

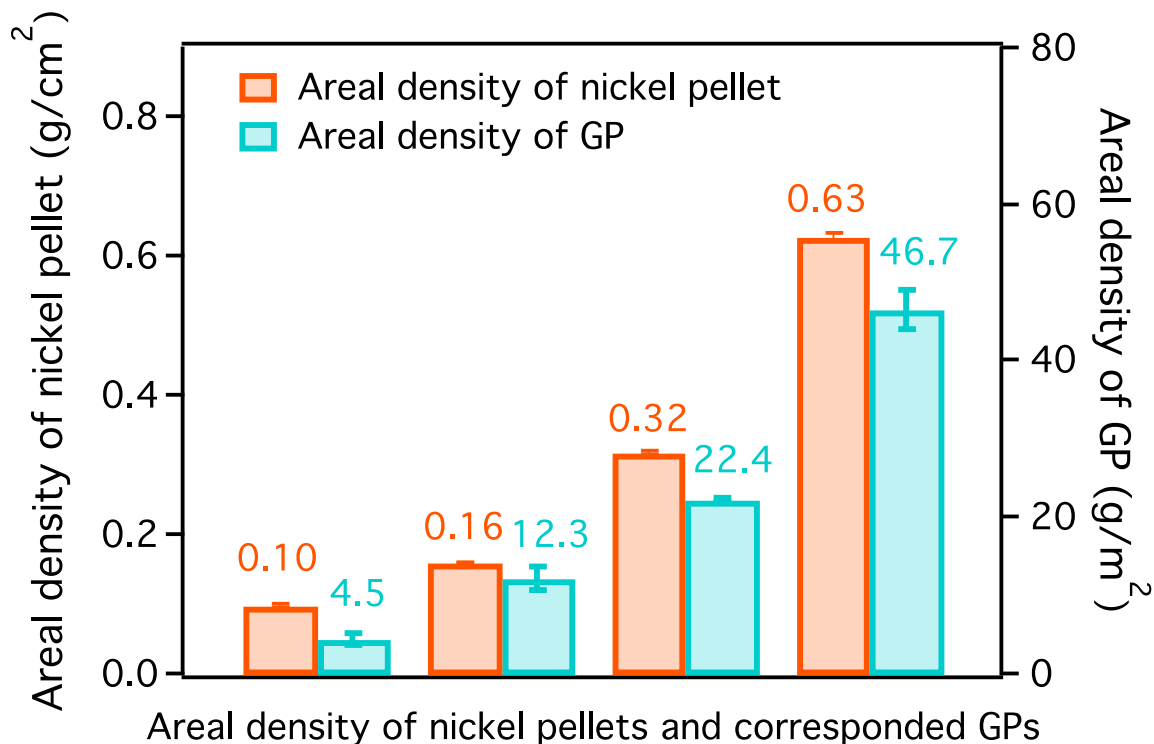

**Figure S1.** Areal density of different nickel pellets and of the corresponding graphene pellets (GPs). In this work, graphene pellet with areal density of 4.5 g/m<sup>2</sup> was used in electrochemical tests. The error bars represent the standard deviations calculated based on 3 tested specimens for each sample.

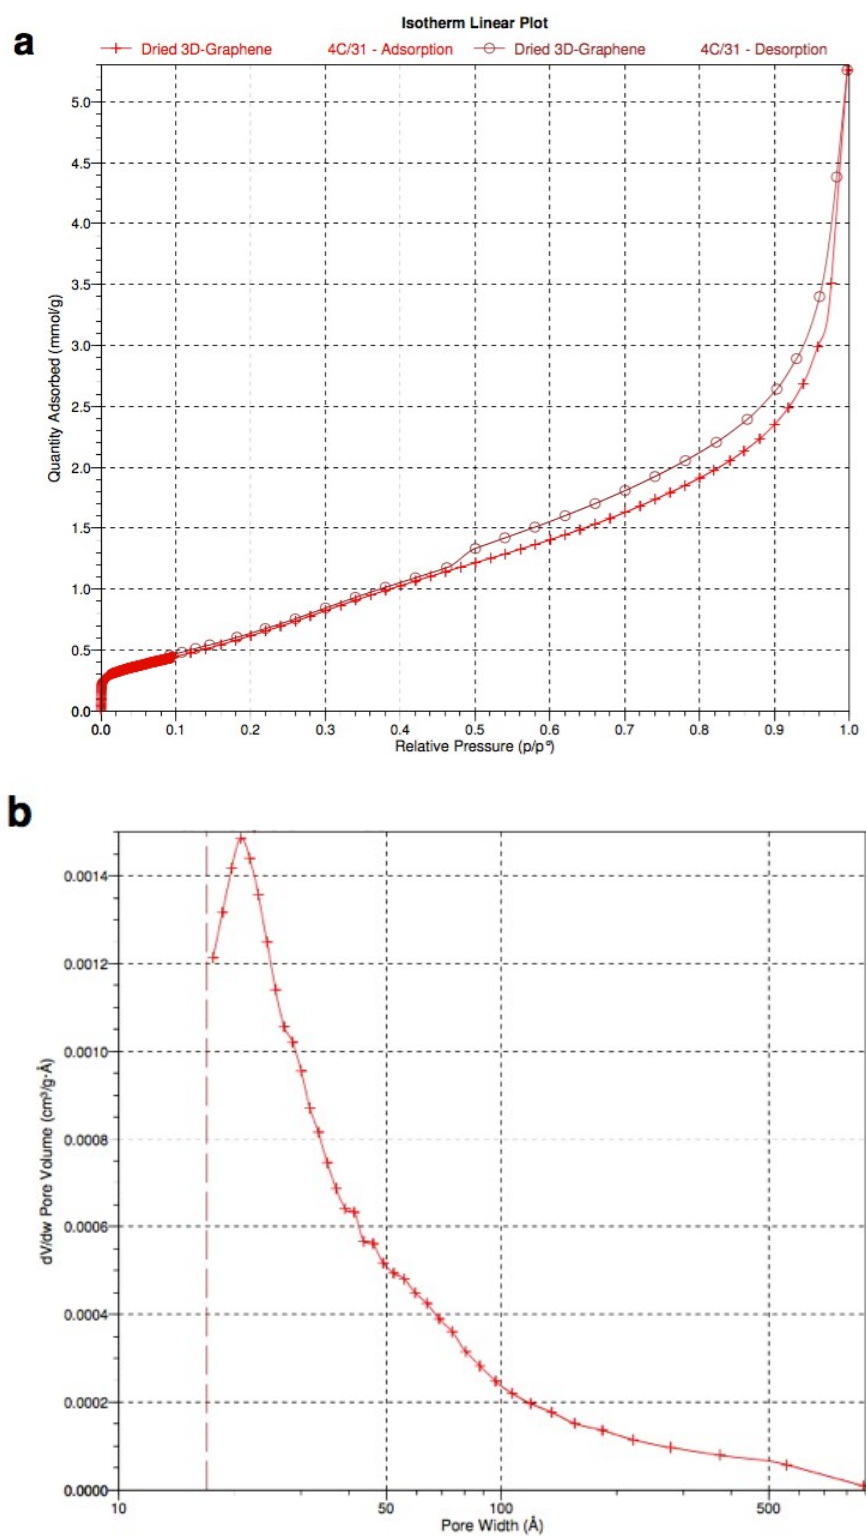

Figure S2. Brunauer-Emmett-Teller (BET) study of GPs. (a) Typical nitrogen adsorption-desorption isotherm. (b) Barrett-Joyner-Halenda (BJH) pore size distribution plots of GPs.

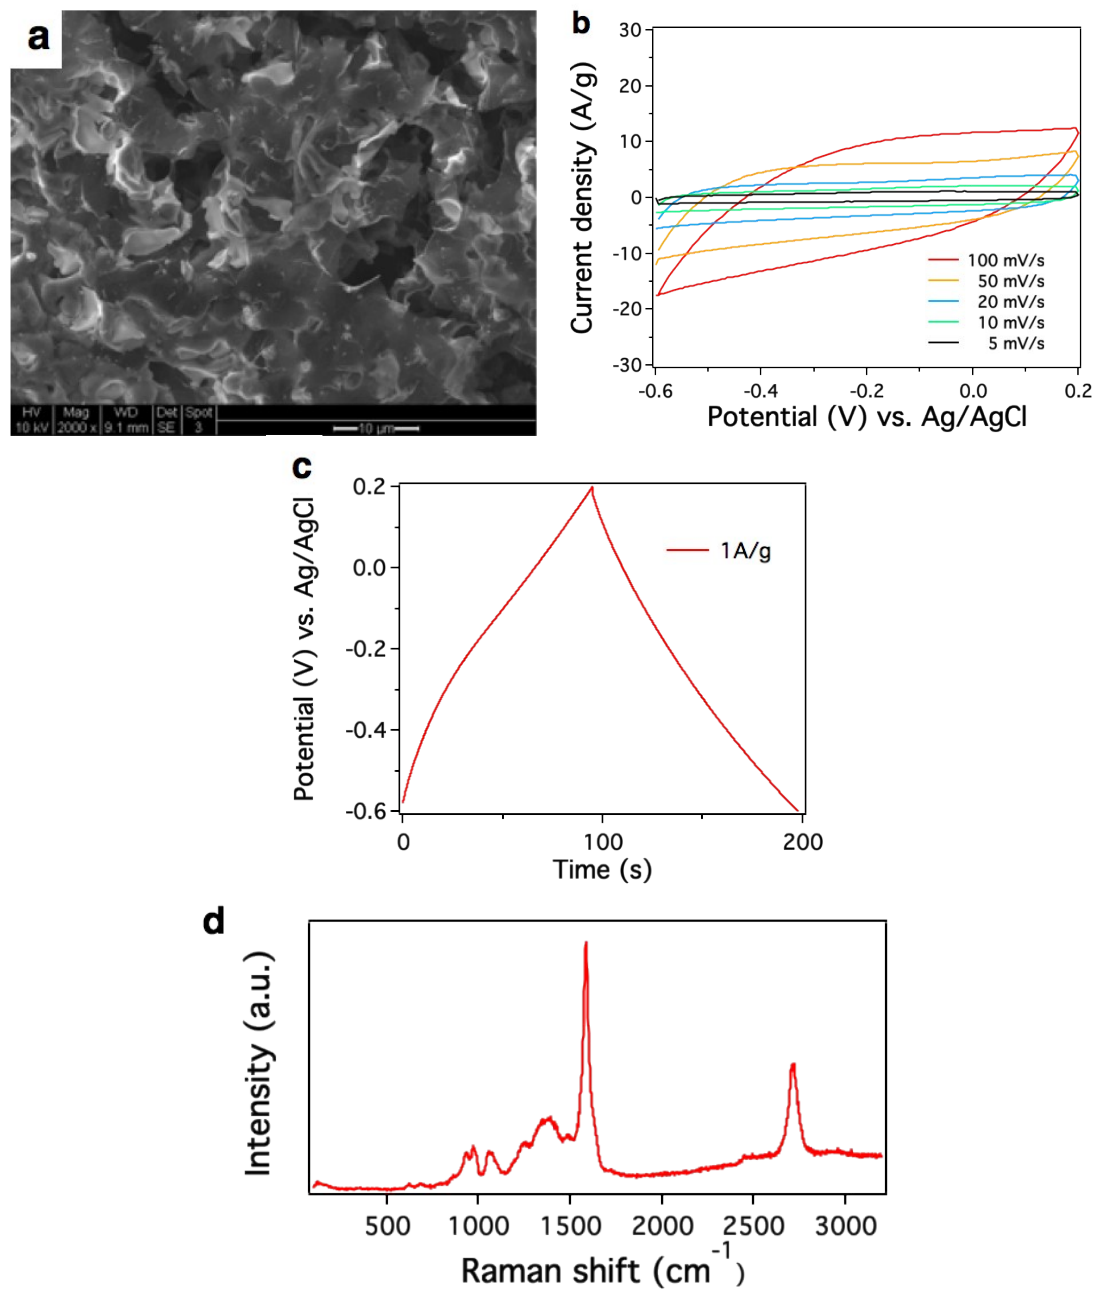

**Figure S3.** (a) SEM image of GP/Ppy sample. (b) Cyclic voltammetry curves of GP/Polypyrrole (Ppy) electrode at different scan rates from 5 mV/s to 100 mV/s. (c) Charge-discharge curve of GP/Ppy electrode at a current density of 1 A/g. (d) Raman Spectrum of Ppy/GP electrode showing typical peaks as suggested by the literature<sup>1</sup>

## References

1. Y. Zhao, J. Liu, Y. Hu, H. Cheng, C. Hu, C. Jiang, L. Jiang, A. Cao and L. Qu, *Advanced Materials*, 2013, **25**, 591-595.
